# Supplementary material for: AXL confers cell migration and invasion by hijacking a PEAK1-regulated focal adhesion protein network
Source: PubMed Central journal article supplement (PMC7368075; doi:10.1038/s41467-020-17415-x), 2020-07-17
Supplement: 41467_2020_17415_MOESM3_ESM.pdf [file 41467_2020_17415_MOESM3_ESM.pdf]

## **Description of Additional Supplementary Files**

File Name: Supplementary Data 1

Description: List of AXL phosphomodulated proteins upon GAS6 stimulation

File Name: Supplementary Data 2

Description: Table 2: Gene enrichment analysis of phosphomodulated proteins using gProfiler

File Name: Supplementary Data 3

Description: Table 3: List of NEDD9 preys obtained from BioID

File Name: Supplementary Data 4

Description: Table 4: Gene enrichment analysis of NEDD9 preys using gProfiler

File Name: Supplementary Data 5

Description: Table 5: List of PEAK1 wildtype and mutant preys obtained from BioID

File Name: Supplementary Data 6

Description: Table 6: Gene enrichment analysis of PEAK1 preys using gProfiler

File Name: Supplementary Movie 1

Description: Representative video of MDA-MB-231 cells expressing GFP-PAXILLIN treated with either DMSO or 1 $\mu$ M R428 and imaged live for 30min, Scale bar, 20 $\mu$ m.

File Name: Supplementary Movie 2

Description: Representative video of MDA-MB-231 cells expressing GFP-PAXILLIN serum starved and treated or not with GAS6 and imaged live for 30min, Scale bar, 20 $\mu$ m.

File Name: Supplementary Movie 3

Description: Representative video of MDA-MB-231 cells expressing GFP-PAXILLIN and Lifeact-RFP, transfected with 100nM of siCTRL or siPEAK1, and serum-starved and treated with or without GAS6 and imaged live for 30min, Scale bar, 20 $\mu$ m.
